# Supplementary material for: Establishment of Patient-Derived Succinate Dehydrogenase–Deficient Gastrointestinal Stromal Tumor Models for Predicting Therapeutic Response
Source: Oxford University Press journal article supplement (doi:10.1158/1078-0432.ccr-21-2092), 2021-08-23
Supplement: 10780432ccr212092-sup-267178_1_supp_7330801_qy3gfj.docx [file 10780432ccr212092-sup-267178_1_supp_7330801_qy3gfj.docx]

**Supplementary Table S2. Quantitative RT-PCR primer sequences.**

|  | **Forward Primer** | **Reverse Primer** | **Reference** |
| --- | --- | --- | --- |
| ***HIF1A*** | TTTTTCAAGCAGTAGGAATTGGA | GTGATGTAGTAGCTGCATGATCG | (25) |
| ***HIF2A*** | CGGAGGTGTTCTATGAGCTGG | AGCTTGTGTGTTCGCAGGAA | (24) |
| ***LDHA*** | ACCGTGTTATTGGAAGCGGT | CTCCATGTTCCCCAAGGACC | (25) |
| ***VEGFA*** | AGGGCAGAATCATCACGAAGT | AGGGTCTCGATTGGATGGCA | (23) |
| ***SLC2A1*** | TATCGTCAACACGGCCTTCACTGT | AACAGCTCCTCGGGTGTCTTATCA | (23) |
| ***SLC2A3*** | TCCACGCTCATGACTGTTTC | GCCTGGTCCAATTTCAAAGA | (23) |
| ***ß-actin*** | AATGTGGCCGAGGACTTTGATTGC | AGGATGGCAAGGGACTTCCTGTAA | (25) |
